# Supplementary material
Source: HighWire-hosted journal article supplement (https://bmjopen.bmj.com/content/13/5/e072243)
Supplement: inline-supplementary-material-1 [file inline-supplementary-material-1.pdf]

## Kihon Checklist

| Domain             | No. | Questions                                                                                                           | Answer                          |                                |
|--------------------|-----|---------------------------------------------------------------------------------------------------------------------|---------------------------------|--------------------------------|
| Daily life         | 1   | Do you go out by bus or train by yourself?                                                                          | <input type="checkbox"/> 0. YES | <input type="checkbox"/> 1. NO |
|                    | 2   | Do you go shopping to buy daily necessities by yourself?                                                            | <input type="checkbox"/> 0. YES | <input type="checkbox"/> 1. NO |
|                    | 3   | Do you manage your own deposits and savings at the bank?                                                            | <input type="checkbox"/> 0. YES | <input type="checkbox"/> 1. NO |
|                    | 4   | Do you sometimes visit your friends?                                                                                | <input type="checkbox"/> 0. YES | <input type="checkbox"/> 1. NO |
|                    | 5   | Do you turn to your family or friends for advice?                                                                   | <input type="checkbox"/> 0. YES | <input type="checkbox"/> 1. NO |
| Physical function  | 6   | Do you normally climb stairs without using handrail or wall for support?                                            | <input type="checkbox"/> 0. YES | <input type="checkbox"/> 1. NO |
|                    | 7   | Do you normally stand up from a chair without any aids?                                                             | <input type="checkbox"/> 0. YES | <input type="checkbox"/> 1. NO |
|                    | 8   | Do you normally walk continuously for 15 minutes?                                                                   | <input type="checkbox"/> 0. YES | <input type="checkbox"/> 1. NO |
|                    | 9   | Have you experienced a fall in the past year?                                                                       | <input type="checkbox"/> 1. YES | <input type="checkbox"/> 0. NO |
| Nutrition          | 10  | Do you have a fear of falling while walking?                                                                        | <input type="checkbox"/> 1. YES | <input type="checkbox"/> 0. NO |
|                    | 11  | Have you lost 2kg or more in the past 6 months?                                                                     | <input type="checkbox"/> 1. YES | <input type="checkbox"/> 0. NO |
| Oral function      | 12  | Height:    cm, Weight:    kg, BMI:    kg/m <sup>2</sup> If BMI is less than 18.5, this item is                      | <input type="checkbox"/> 1. YES | <input type="checkbox"/> 0. NO |
|                    | 13  | Do you have any difficulties eating tough foods compared to 6 months ago?                                           | <input type="checkbox"/> 1. YES | <input type="checkbox"/> 0. NO |
|                    | 14  | Have you choked on your tea or soup recently?                                                                       | <input type="checkbox"/> 1. YES | <input type="checkbox"/> 0. NO |
| Homebound          | 15  | Do you often experience having a dry mouth?                                                                         | <input type="checkbox"/> 1. YES | <input type="checkbox"/> 0. NO |
|                    | 16  | Do you go out at least once a week?                                                                                 | <input type="checkbox"/> 0. YES | <input type="checkbox"/> 1. NO |
| Cognitive function | 17  | Do you go out less frequently compared to last year?                                                                | <input type="checkbox"/> 1. YES | <input type="checkbox"/> 0. NO |
|                    | 18  | Do your family or your friends point out your memory loss?<br>e.g. "You ask the same question over and over again." | <input type="checkbox"/> 1. YES | <input type="checkbox"/> 0. NO |
|                    | 19  | Do you make a call by looking up phone numbers?                                                                     | <input type="checkbox"/> 0. YES | <input type="checkbox"/> 1. NO |
| Depression         | 20  | Do you find yourself not knowing today's date?                                                                      | <input type="checkbox"/> 1. YES | <input type="checkbox"/> 0. NO |
|                    | 21  | In the last 2 weeks have you felt a lack of fulfillment in your daily life?                                         | <input type="checkbox"/> 1. YES | <input type="checkbox"/> 0. NO |
|                    | 22  | In the last 2 weeks have you felt a lack of joy when doing the things you used to enjoy?                            | <input type="checkbox"/> 1. YES | <input type="checkbox"/> 0. NO |
|                    | 23  | In the last 2 weeks have you felt difficulty in doing what you could do easily before?                              | <input type="checkbox"/> 1. YES | <input type="checkbox"/> 0. NO |
|                    | 24  | In the last 2 weeks have you felt helpless?                                                                         | <input type="checkbox"/> 1. YES | <input type="checkbox"/> 0. NO |
|                    | 25  | In the last 2 weeks have you felt tired without a reason?                                                           | <input type="checkbox"/> 1. YES | <input type="checkbox"/> 0. NO |

Working group on Frailty in Japanese Geriatric Society

Arai H, Satake S. English translation of the Kihon Checklist. *Geriatr Gerontol Int.* 2015 Apr;15(4):518-519.

### Supplemental Figure 1. English version of the Kihon Checklist
