# Supplementary material
Source: HighWire-hosted journal article supplement (https://bmjopen.bmj.com/content/13/5/e072243)
Supplement: inline-supplementary-material-2 [file inline-supplementary-material-2.pdf]

## Questionnaire on Social Participation Activities

---

### 1. Social Participation Activities

Q1: Do you currently participate in any of the following activities in your community?

- ① Community-based social activity (neighbourhood association, club for the elderly, exchange salon, etc.)
- ② Exercise-based social activity (gymnastics classes, ground golf, etc.)
- ③ Hobby activities (handicrafts, gardening, board games, etc.)
- ④ Volunteer/non-profit organisation activities (community-cleaning activities and counselling neighbouring residents, etc.)
- ⑤ Not participating.

### 2. Interaction with Neighbours<sup>1</sup>

Q2: How do you socialize with your neighbors?

- ① I talk and cooperate in terms of life with other people.
- ② I have a daily standing conversation with at least one other person.
- ③ I only socialize by greeting others.
- ④ I have no interaction with neighbours.

### 3. Trust in the Community

Q3. Do you think trusting relationships with neighbors are important in your daily life?

- ① Agree.
  - ② Partially agree.
  - ③ Neither agree nor disagree.
  - ④ Disagree.
- 

1. Ministry of Agriculture, Forestry and Fisheries. Social Capital in Rural Communities, Appendix 2, "Questionnaire on Rural Social Capital". 2007

[https://www.maff.go.jp/j/nousin/noukei/socialcapital/pdf/ref\\_data101.pdf](https://www.maff.go.jp/j/nousin/noukei/socialcapital/pdf/ref_data101.pdf) (Accessed 16 Mar 2023).

**Supplemental Figure 2.** Questionnaire on Social Participation Activities.
